1 **Experimental evidence for sexual selection against inbred males when it truly counts**

2

3 Regina Vega-Trejo <sup>1,\*</sup>, Megan L. Head<sup>1</sup>, J. Scott Keogh<sup>1</sup> and Michael D. Jennions<sup>1</sup>

4 <sup>1</sup>Division of Evolution, Ecology and Genetics

5 Research School of Biology

6 The Australian National University

7 Acton, Canberra

8 ACT 2601

9 Australia

10

11 \*Corresponding author; Regina Vega-Trejo, e-mail: reginavegatrejo@gmail.com

12 Ph: +61 2 6125 3828

13

14 Data Accessibility: Data will be deposited in Dryad upon acceptance.

# **Abstract**

Although there are many correlational studies, unbiased estimates of inbreeding depression only come from experimental studies that create inbred and outbred individuals. Few such studies determine the extent to which inbreeding depression in males is due to natural or sexual selection. Importantly, traits that are closely related to fitness are predicted to be most strongly affected by inbreeding depression, so measuring fitness or key fitness components, rather than phenotypic traits, is necessary to estimate inbreeding depression accurately. Here, we experimentally created inbred and outbred male mosquitofish (*Gambusia holbrooki*) by mating full-sibs ( $f=0.25$ ). We show this led to a 23% reduction in genome-wide heterozygosity. Males were then raised on different diets early in life. We then allowed adult males to compete freely for females to test if inbreeding, early diet, and their interaction affect a male's share of paternity. Early diet had no effect on paternity, but outbred males sired almost twice as many offspring as inbred males. We also found that males with a relatively long gonopodium (intromittent organ) had greater reproductive success. We demonstrate that inbreeding has important consequences because it negatively affects a key component of male fitness. Given there was no difference in adult mortality this finding can only be due to inbreeding negatively affecting sexually selected traits.

**Keywords:** heterozygosity, inbreeding depression, paternity, mosquitofish

## Introduction

Evidence that inbreeding in animals negatively affects lifetime reproductive success or other close proxies of fitness, comes from two main streams of research: correlational studies (mainly of wild populations), and experimental studies on laboratory or captive populations that create inbred and outbred individuals. Correlational evidence for inbreeding depression includes: a) comparing traits among populations of the same species, specifically between small, isolated populations that have experienced varying degrees of inbreeding and large, outbred populations [1-4]; b) using molecular markers to obtain direct estimates of individual levels of inbreeding within a population and then relating these to fitness measures [i.e. heterozygosity-fitness correlations: HFCs; 5, 6-8]; c) calculating an individual's inbreeding coefficient from pedigree data and then relating this to a fitness measure [8-11]. Although correlational studies often suggest that inbreeding lowers fitness, other factors cannot be ruled out. For example, inbred individuals might more often occur in peripheral environments that are of low quality such that there is a direct environmental effect on offspring phenotypes. More generally, the reduced fitness of inbred individuals might partly result from additive genetic effects rather than non-additive interactions within loci [i.e. lower heterozygosity; 12]. If focal traits are heritable, and individuals with lower values tend to mate with relatives because they have poorer dispersal ability or struggle to attract mates, this will lead to systematic overestimation of the negative effects of inbreeding [see the discussion in 12]. Inbred offspring will inherit lower trait values regardless of any direct effects of inbreeding. Studies that experimentally manipulate levels of inbreeding with controlled breeding designs offer a better approach when trying to quantify the costs of inbreeding.

To date, relatively few experimental studies have looked at the effects of inbreeding on estimates of fitness in non-domesticated animals. Of these, only a handful of studies have specifically looked at male fitness [e.g. 13, 14-16]. It therefore remains an open question as to the extent to which males are more susceptible than females to inbreeding depression. Mating success and fertilization success under sperm competition are major determinants of male fitness in most species [17-19]. Sexually selected traits that confer a mating or fertilization advantage are often under strong directional sexual selection and, in addition, they tend to be condition-dependent. Condition-dependence has been described as a form of 'genic capture' because condition reflects how well the individual accumulates resources [20, 21]. This ability is likely to depend on many traits (e.g. foraging ability, food absorption efficiency, timing of development) all of which could be negatively affected by inbreeding. It is therefore plausible that due to sexual selection male mating success will show greater inbreeding depression than an equivalent naturally selected female trait such as fecundity. These data cannot, however, be obtained from studies that measure male lifetime reproduction output as they confound lifespan with reproductive success per potential breeding event (i.e. sexual selection).

Within experimental studies of animals that try to measure fitness there is high variation in the reported magnitude of inbreeding depression [e.g. 16, 22, 23, 24]. One possible source of variation is whether test individuals are exposed to a stressful environment [25, 26]. Inbreeding might make individuals less effective at buffering themselves against environmental stress [27]. Dietary and temperature stress, for example, increase the extent of inbreeding depression in some species [28-31]. More generally, rearing animals in a benign lab environment (or plants in well-watered greenhouses) is often put forward to explain the absence of inbreeding depression in a laboratory study [32, 33]. Another potential source of variation in estimates of inbreeding depression might arise from the

evolutionary history of study populations affecting the baseline level and variability of homozygosity. For instance, as mean homozygosity in a population increases the difference in homozygosity between offspring of closely related individuals and those from random matings decreases [34]. This makes it harder to detect inbreeding depression. To date, studies that investigate how these potential sources of variation influence the effects of inbreeding on fitness-enhancing traits remain scant [but see 28, 34, 35].

Here we conduct an experiment to investigate how differences in inbreeding and juvenile diet (i.e. early stressful environment) influence a key component of male fitness, namely their reproductive success. We experimentally generated inbred and outbred male mosquitofish (*Gambusia holbrooki*) that were then reared on different diets as juveniles [36]. We then allowed males to compete freely for access to females and examined their share of paternity. The ability to gain paternity under sperm and mating competition is a key fitness component for males in species with high levels of female polyandry, such as *G. holbrooki*. Importantly our experimental design allows us to isolate sexual selection (as opposed to other forms of natural selection) as the cause of any inbreeding depression. In addition to our experimental manipulation of inbreeding using a controlled pedigree we measured each male's actual genome wide heterozygosity (based on >3000 SNPS) to shed light on how much variation in inbreeding is needed to detect inbreeding depression. We predict that under the competitive mating scenario we created that, if it occurred, inbreeding depression would be greater for males reared in a stressful environment.

## Methods

### *Origin of fish*

We used mosquitofish descended from wild caught fish collected in Canberra, Australia. The design used to create inbred and outbred males that were then reared on different diets is fully described in [36]. In brief, in each experimental block we mated individuals from two full sibling families (e.g. A and B in block 1, C and D in block 2 and so on). Brothers and sisters from full sibling families were paired to create inbred offspring (AA, BB;  $f=0.25$ ) and outbred offspring with reciprocal male-female crosses (AB, BA) to generate four cross-types. We set up 29 blocks (= maximum of 116 different family pairings types). The 452 male offspring from 192 broods (some experimental blocks had more than one pairing of a given type) were then reared individually in 1L tanks until maturity. Males then underwent a diet manipulation for 21 days between day 7 and day 28-post birth that lead to almost zero growth [36]. Fish on the control diet were fed *ad libitum* with *Artemia* nauplii twice a day (i.e. standard laboratory feeding regime) while fish on the restricted diet were fed 3mg of *A. nauplii* once every other day (i.e. < 25% of the control food intake). Broods were split evenly between the control and restricted diet treatment.

### *Experimental design*

To determine whether inbreeding, diet, or their interaction predict paternity we set up mating trials in which four males, one per treatment, could compete and mate freely with a female in a 60L tank ( $n=31$ ). Males were randomly assigned to each replicate and were not match for size (size range: 18.51 - 26.96 mm). Males were allowed to mate freely with a female for a week and then given a week to recover after the female was removed. The process was then repeated with two more females. The 93 test females were then placed in individual 1L tanks and allowed six weeks to give birth. They were checked for offspring twice daily. Once fish were removed from the treatment they were euthanized and preserved in absolute ethanol and stored at -20°C.

139

# 140 *Male morphology*

141

142 The phenotype of all males was measured prior to being placed in tanks with females. Males  
143 were anaesthetized by submersion in ice-cold water for a few seconds to reduce movement  
144 and then placed on polystyrene with a microscopic ruler (0.1 mm gradation) and  
145 photographed. We measured male standard length (SL = snout tip to base of caudal fin) and  
146 gonopodium length (intromittent organ modified from the anal fin) using Image J software  
147 [37]. The males were 28 – 37 weeks post-maturity and were marked with a small coloured  
148 dot for visual identification using fluorescent elastomer (Northwest Marine Technology, WA)  
149 injected subcutaneously behind the caudal fin. They were given at least four days recovery  
150 before going into 60L tanks to start mating trials. We calculated relative gonopodium size as  
151 the residuals from a linear regression of gonopodium size (log) on male standard length  
152 (log).

153

# 154 *Paternity analysis*

155

156 To determine male reproductive success and heterozygosity for the fish in our experiment  
157 we took tissue samples from each male (n=121), females that bred (n=79 of 93), and a  
158 maximum of 10 fry per female (n=628 offspring). Two of the 124 males (both outbred) were  
159 not found in the tank at the end of the trial (i.e. escaped or died) and therefore no tissue  
160 was available. For adults, DNA was extracted from the tail muscle/caudal fin. For fry DNA  
161 was extracted from the whole body, excluding the head. DNA was extracted using Qiagen  
162 DNeasy Blood & Tissue Kits following the manufacturer's instructions. After extraction, DNA  
163 samples were SNP genotyped. Full methods for the paternity analysis are in [38].

164

## Heterozygosity

We estimated heterozygosity by using the number of markers that were scored as heterozygous divided by the total number of successfully classified markers for each fish. Based on over 3000 SNP loci we found that a brother-sister mating led to a significant decline in offspring heterozygosity ( $F_{(1,120)} = 215.1, P < 0.001$ ). The mean heterozygosity of inbred fish was 23.2% less than that of outbred fish (close to the expected 25% decline). The proportion of loci that were heterozygous was  $0.239 \pm 0.003$  in inbred males and  $0.311 \pm 0.004$  in outbred males ( $n = 62, 59$ ).

## Statistical analysis

We used Generalized Linear Mixed-effect models (GLMM) with Poisson error to test for fixed effects of inbreeding, relative heterozygosity (see below), diet, body size, relative gonopodium length, and the interaction between inbreeding and diet on how many offspring males sired. We used the *glmer* function in the *lme4* package in R 3.0.2 software [39]. To obtain a measure of relative heterozygosity we centered heterozygosity (mean = 0) within each inbreeding treatment. We could then test whether it explained additional variation in male reproductive success beyond that associated with the decline in absolute heterozygosity due to inbreeding. We also included the interaction between standardized heterozygosity and inbreeding to test for any difference in the effects of this additional variation in heterozygosity between inbred and outbred males (i.e. the effect will differ if there is a non-linear relationship between absolute heterozygosity and fitness). To account for overdispersion we included individual as a random effect [40]. We included tank as a random effect to account for potential non-independence. We included sire and dam as random effects. There was no effect so we present the simplified version of the model. All

model terms were tested for significance using the Anova function in the *car* package specifying Type III Wald chi-square tests. We removed non-significant interactions following [41]. All tests are two-tailed and alpha is set at 0.05.

## Results

### *Inbreeding*

On average, outbred males sired significantly more offspring than inbred males (Table 1, Fig. 1). In 20 of 31 trials, the two outbred males sired more offspring than the two inbred males. More heterozygous males therefore had significantly greater reproductive success.

### *Relative Heterozygosity*

We did not find any difference in how relative heterozygosity affected male reproductive success between inbred and outbred males (heterozygosity  $\times$  inbreeding,  $P = 0.350$ ). There was also no effect of relative heterozygosity on male reproductive success (Table 1). Together these findings indicate that the standing variation in heterozygosity (i.e. that in outbred males) did not predict variation in male reproductive success.

### *Diet*

We did not find an effect of diet on the number of offspring sired (Table 1). There was also no significant interaction between inbreeding status and diet ( $P = 0.586$ ).

### *Male morphology*

217

218 Males with a relatively longer gonopodium sired significantly more offspring. We did not,  
219 however, find an effect of male body size on the number of offspring sired (Table 1).

220

## 221 Discussion

222

223 Inbreeding is expected to decrease fitness due to the negative effects of lower  
224 heterozygosity [42, 43]. Here we used a controlled breeding design combined with a  
225 genome wide SNP-based measure of heterozygosity to test whether inbreeding, as well as  
226 residual variation in heterozygosity, affects a key component of male fitness, namely male  
227 reproductive success. We found that one generation of inbreeding between full-siblings ( $f$   
228  $=0.25$ ) significantly lowered a male's ability to gain paternity by almost 50% (6.37 vs 3.76  
229 offspring). Outbred males sired significantly more offspring than inbred males when they  
230 had to compete for mates and fertilization opportunities. Sexual selection therefore favours  
231 outbred males. In addition, relative gonopodium length explained some of the remaining  
232 variation in reproductive success. Males with a longer gonopodium were significantly more  
233 successful. We found no evidence for an effect of diet or body size on male reproductive  
234 success. Nor did we find any effect of residual variation in heterozygosity once we  
235 accounted for the 23.2% decline in heterozygosity associated with inbreeding in our  
236 pedigree design (i.e. full-sibling parents versus unrelated parents).

237

## 238 *Heterozygosity and male fitness*

239 There is much indirect evidence from correlational studies that inbreeding reduces male  
240 reproductive success [8, 44-46]. In contrast, studies comparing the reproductive output of  
241 experimentally created inbred and outbred males have yielded less consistent results. For  
242 example, inbreeding depression had no effect on male offspring production in some

contexts in flour beetles [*Tribolium castaneum*; 14], while the proportion of offspring sired by inbred males was lower than that of outbred males in bulb mites (*Rhizoglyphus robini*) [*Rhizoglyphus robini*; 15]. In guppies (*Poecilia reticulata*), inbred males sired significantly fewer offspring than outbred males, but only when the inbreeding coefficient was at least  $f = 0.25$  [i.e. two successive generations of full-sib breeding; 13]. Inbreeding is, in essence, simply a process that decreases heterozygosity. Our experiment therefore reveals a significant heterozygosity-fitness correlation (HFC) for male *G. holbrooki*. However, we also show that detecting this HFC could be difficult using standing variation in heterozygosity, as occurs in field studies [7, 47, 48]. Specifically, we found no effect of residual variation in heterozygosity for either inbred or outbred males. The latter males are roughly equivalent to the field population. It is therefore noteworthy that in a new study of field-caught males, albeit with a larger sample ( $n = 240$  putative sires), we detected a significant HFC for male reproductive success when males compete for females in semi-natural pools (Head et al. *submitted*—available for reviewers in supplementary material). One interpretation of this is that developing under more stressful field conditions exacerbates inbreeding depression.

Studies of inbreeding in wild populations usually fail to tease apart natural and sexual selection against inbred males. Reports of lower reproductive success for less heterozygous (i.e. inbred) males could be due to natural selection because of lower rates of survival [e.g. 49, 50], which will, all else being equal, reduce their lifetime reproductive success; and/or because inbred males are less attractive to females or are weaker competitors [24, 51-53]. In our experiment, we can eliminate natural selection through mortality as a source of variation in male reproductive success, so sexual selection most likely explains the lower reproductive success of inbred males. Interestingly, however, in another study we did not detect inbreeding depression for either sperm traits or male attractiveness in *G. holbrooki*, despite much larger sample sizes than in the current study (J. Marsh, R. Vega-

Trejo, M.L. Head, and M.D. Jennions 'unpublished data'). A lack of inbreeding depression in sperm traits in an introduced species (*G. holbrooki* are feral pests in Australia) could be attributed to low genetic variation due to founder effects [54]. However, the results we present in the current study highlight the need to look how inbreeding affects key fitness components, rather than phenotypic traits that are only indirect proxies for fitness. Given inbreeding depression for male reproductive success, future studies will need to look in more detail at the effects of inbreeding on attractiveness, ejaculate characteristics, male mating behaviour and fertilisation capacity.

#### *Inbreeding depression in stressful and benign environments*

There is a trend for inbreeding depression to be higher in a more stressful environment [25, 26]. By definition a more stressful environment is one that reduces fitness relative to a baseline environment [25]. Our low food diet resulted in almost zero growth over a three-week period [see 36], which strongly suggests that we created a stressful environment. Corroborating this, we have previously shown that this low food diet significantly reduces male attractiveness [55]. In studies of other taxa, mainly insects, a poor juvenile diet has been shown to reduce the ability of males to gain paternity [e.g. 56], which is mainly attributed to a lower sperm count and reduced sperm competitiveness [57, 58]. Elsewhere we have shown that, controlling for age, a poor juvenile diet reduces sperm reserves and sperm replenishment rates in younger male *G. holbrooki* (see Vega-Trejo et al *submitted*—available for reviewers in supplementary material). The males in our current experiment were, however, sufficiently old (28- 37 weeks post-maturation) that those on both diets should have had similar sperm production rates so the juvenile diet was not stressful for sperm production. If sperm numbers are a major determinant of male reproductive success this would partly explain why there was no main or interactive effect of diet on male

reproductive success. Again, however, this then raises the question of the proximate mechanism causing inbred males to have significantly lower paternity.

Studies of a range of taxa report a weak or no relationship between inbreeding depression and the level of dietary stress [effect size  $r = -0.13$  to  $0.02$ ; 59, 60, 61], but most of the focal traits measured in these studies are naturally selected. Sexually selected traits that affect male reproductive success are predicted to be more sensitive to inbreeding depression because of their stronger links with fitness [21, 62-64], and more sensitive to environmental stress because they tend to be condition-dependent [65, 66]. It is therefore intriguing that we found significant inbreeding depression for male reproductive success but no effect of diet on a male's share of paternity. More generally, additional studies of many more taxa are needed to establish whether sexually selected traits show the same pattern as naturally selected traits [25, 26] with respect to whether a more stressful environment elevates inbreeding depression.

### *Morphological predictors of male fitness*

Males with a relatively long gonopodium for their body size had significantly higher reproductive success, even taking into account the effects of heterozygosity. This corroborates results from another study of *G. holbrooki* in semi-natural pools (Head et al. *submitted*—available for reviewers in supplementary material). Several studies of poeciliid fishes report a link between relative gonopodium length and male fitness [67-71] but see Booksmythe et al. 2016). Male body size is another trait that is often implicated in sexual selection in *G. holbrooki* but in the current study we found that it had no effect on male reproductive success. Male mosquitofish use a coercive mating tactic in which they position themselves behind the female and then thrust their gonopodium forward in an attempt to

transfer sperm into the female's gonoduct [72, 73]. Male size is highly variable and small males have greater manoeuvrability that seems to increase their propensity to sneak copulations [74]. Large males are, however, socially dominant, and might additionally transfer more sperm per encounter because they have larger sperm reserves [75]. This could compensate for the reduced ability of larger males to obtain sneak copulations [74-76]. The net relationship between male body size and reproductive success is likely to depend on the social context, including the absolute size difference between a male and female and the extent of male-male competition for matings [74]. In another paternity study we found that smaller males had significant greater reproductive success when they competed freely for mates in 24 semi-natural pools that varied in the adult sex ratio and habitat complexity (Head et al. *submitted*—available for reviewers in supplementary material). Spatio-temporal variation in how male size affects reproductive success seems likely given the wide size range at which males reach sexual maturity (there is almost no post-maturation growth), even when they are reared under identical laboratory conditions.

### Conclusions

We conducted an experiment that showed that inbreeding reduces a key fitness component (share of paternity) of male *Gambusia holbrooki*. Our design removed most sources of natural selection (e.g. offspring and adult survival, time to maturation), so the lower success of inbred males strongly suggests that inbreeding affects sexual selected traits. This is important as sexual selection against inbred males could reduce the genetic load [33]. If inbred males are less likely to mate and/or fertilize eggs, this will reduce the frequency of deleterious recessive alleles and potentially lower the risk of extinction in small populations [77-80]. This possibility, if generally true in other taxa, could be profitably incorporated into models of population viability.

346

347 Our study is also a reminder that standing variation in heterozygosity plays an important role  
 348 in the likelihood of detecting inbreeding depression, which might explain variation in  
 349 reported level of inbreeding depression in other studies [e.g. 7, 47, 48]. Standing variation in  
 350 heterozygosity, hence the use of heterozygosity-fitness correlations, was insufficient to  
 351 detect inbreeding depression in our study as there was no effect of relative heterozygosity  
 352 on paternity. We only detected inbreeding depression between our inbreeding treatment  
 353 led to a 23% decline in heterozygosity. Given the potential for inbreeding to shape the  
 354 evolution of key life history traits [81], more studies are needed that quantify inbreeding  
 355 depression by taking an experimental approach and then measure fitness as directly as  
 356 possible (i.e. reproductive success not simply phenotypic traits).

357

# **358 Competing interests**

359 The authors declare that they have no competing interests.

360

# **361 Authors' contributions**

362 R.V.T., M.L.H., and M.D.J. designed the study. R.V.T carried out the experimental work. J.S.K.  
 363 analysed the paternity data. R.V.T., M.L.H., and M.D.J. analysed the data and wrote the  
 364 manuscript. All the authors contributed substantially to revisions, and gave final approval for  
 365 publication.

366

# **367 Acknowledgements**

368 We thank the ANU Animal Services team for fish maintenance. Animal use permit: ANU  
 369 AEEC animal ethics protocol A2011/64. The authors thank Rose E. O'Dea for helping with the  
 370 experimental work.

371

372     **Funding**

373     The study was financially supported by the Australian Research Council (DP160100285) to

374     M.D.J. R.V.T. is supported by fellowships from Consejo Nacional de Ciencia y Tecnología-

375     México and the Research School of Biology.

376

## References

- [1] Waldan, B. & McKinnon, J.S. 1993 Inbreeding and outbreeding in fishes, amphibians, and reptiles. In *The natural history of of inbreeding and outbreeding: theoretical and empirical perspectives* (ed. N.W. Thornhill), pp. 250-282. USA, The University of Chicago Press.
- [2] Madsen, T., Stille, B. & Shine, R. 1996 Inbreeding depression in an isolated population of adders *Vipera berus*. *Biol. Conserv.* **75**, 113-118. (doi:10.1016/0006-3207(95)00067-4).
- [3] Escobar, J.S., Nicot, A. & David, P. 2008 The Different Sources of Variation in Inbreeding Depression, Heterosis and Outbreeding Depression in a Metapopulation of *Physa acuta*. *Genetics* **180**, 1593-1608. (doi:10.1534/genetics.108.092718).
- [4] Furlan, E., Stoklosa, J., Griffiths, J., Gust, N., Ellis, R., Huggins, R.M. & Weeks, A.R. 2012 Small population size and extremely low levels of genetic diversity in island populations of the platypus, *Ornithorhynchus anatinus*. *Ecology and Evolution* **2**, 844-857. (doi:10.1002/ece3.195).
- [5] Balloux, F., Amos, W. & Coulson, T. 2004 Does heterozygosity estimate inbreeding in real populations? *Mol. Ecol.* **13**, 3021-3031. (doi:10.1111/j.1365-294X.2004.02318.x).
- [6] Seddon, N., Amos, W., Mulder, R.A. & Tobias, J.A. 2004 Male heterozygosity predicts territory size, song structure and reproductive success in a cooperatively breeding bird. *P. Roy. Soc. B-Biol. Sci.* **271**, 1823-1829. (doi:10.1098/rspb.2004.2805).
- [7] Chapman, J.R., Nakagawa, S., Coltman, D.W., Slate, J. & Sheldon, B.C. 2009 A quantitative review of heterozygosity-fitness correlations in animal populations. *Mol. Ecol.* **18**, 2746-2765. (doi:10.1111/j.1365-294X.2009.04247.x).
- [8] Huisman, J., Kruuk, L.E.B., Ellis, P.A., Clutton-Brock, T. & Pemberton, J.M. 2016 Inbreeding depression across the lifespan in a wild mammal population. *Proceedings of the National Academy of Sciences*. (doi:10.1073/pnas.1518046113).
- [9] Hedrick, P.W. & Kalinowski, S.T. 2000 Inbreeding depression in conservation biology. *Annu. Rev. Ecol. Syst.* **31**, 139-162. (doi:10.1146/annurev.ecolsys.31.1.139).

- 403 [10] Szulkin, M., Stopher, K.V., Pemberton, J.M. & Reid, J.M. 2013 Inbreeding avoidance,  
404 tolerance, or preference in animals? *Trends Ecol. Evol.* **28**, 205-211.  
405 (doi:10.1016/j.tree.2012.10.016).
- 406 [11] Walling, C.A., Nussey, D.H., Morris, A., Clutton-Brock, T.H., Kruuk, L.E.B. & Pemberton,  
407 J.M. 2011 Inbreeding depression in red deer calves. *BMC Evol. Biol.* **11**. (doi:10.1186/1471-  
408 2148-11-318).
- 409 [12] Becker, P.J., Hegelbach, J., Keller, L.F. & Postma, E. 2016 Phenotype-associated  
410 inbreeding biases estimates of inbreeding depression in a wild bird population. *J. Evol. Biol.*  
411 **29**, 35-46. (doi:10.1111/jeb.12759).
- 412 [13] Zajitschek, S.R.K., Lindholm, A.K., Evans, J.P. & Brooks, R.C. 2009 Experimental evidence  
413 that high levels of inbreeding depress sperm competitiveness. *J. Evol. Biol.* **22**, 1338-1345.  
414 (doi:10.1111/j.1420-9101.2009.01738.x).
- 415 [14] Michalczyk, L., Martin, O.Y., Millard, A.L., Emerson, B.C. & Gage, M.J.G. 2010 Inbreeding  
416 depresses sperm competitiveness, but not fertilization or mating success in male *Tribolium*  
417 *castaneum*. *P. Roy. Soc. B-Biol. Sci.* **277**, 3483-3491. (doi:10.1098/rspb.2010.0514).
- 418 [15] Konior, M., Keller, L. & Radwan, J. 2005 Effect of inbreeding and heritability of sperm  
419 competition success in the bulb mite *Rhizoglyphus robini*. *Heredity* **94**, 577-581.  
420 (doi:10.1038/sj.hdy.6800649).
- 421 [16] Bickley, L.K., Brown, A.R., Hosken, D.J., Hamilton, P.B., Le Page, G., Paull, G.C., Owen,  
422 S.F. & Tyler, C.R. 2013 Interactive effects of inbreeding and endocrine disruption on  
423 reproduction in a model laboratory fish. *Evolutionary Applications* **6**, 279-289.  
424 (doi:10.1111/j.1752-4571.2012.00288.x).
- 425 [17] Birkhead, T.R. & Pizzari, T. 2002 Postcopulatory sexual selection. *Nature Reviews*  
426 *Genetics* **3**, 262-273. (doi:10.1038/nrg774).
- 427 [18] Andersson, M. 1994 *Sexual selection*, Princeton University Press.

- 428 [19] Shuster, S.M. & Wade, M.J. 2003 *Mating systems and strategies*. USA, Princeton  
429 University Press.
- 430 [20] Rowe, L. & Houle, D. 1996 The lek paradox and the capture of genetic variance by  
431 condition dependent traits. *P. Roy. Soc. B-Biol. Sci.* **263**, 1415-1421.  
432 (doi:10.1098/rspb.1996.0207).
- 433 [21] Tomkins, J.L., Radwan, J., Kotiaho, J.S. & Tregenza, T. 2004 Genic capture and resolving  
434 the lek paradox. *Trends Ecol. Evol.* **19**, 323-328. (doi:10.1016/j.tree.2004.03.029).
- 435 [22] Thonhauser, K.E., Raveh, S. & Penn, D.J. 2014 Multiple paternity does not depend on  
436 male genetic diversity. *Anim. Behav.* **93**, 135-141. (doi:10.1016/j.anbehav.2014.04.028).
- 437 [23] Harano, T. 2011 Inbreeding depression in development, survival, and reproduction in  
438 the adzuki bean beetle (*Callosobruchus chinensis*). *Ecol. Res.* **26**, 327-332.  
439 (doi:10.1007/s11284-010-0787-y).
- 440 [24] Meagher, S., Penn, D.J. & Potts, W.K. 2000 Male-male competition magnifies inbreeding  
441 depression in wild house mice. *Proc. Natl. Acad. Sci. U. S. A.* **97**, 3324-3329.  
442 (doi:10.1073/pnas.060284797).
- 443 [25] Armbruster, P. & Reed, D.H. 2005 Inbreeding depression in benign and stressful  
444 environments. *Heredity* **95**, 235-242. (doi:10.1038/sj.hdy.6800721).
- 445 [26] Fox, C.W. & Reed, D.H. 2011 Inbreeding depression increases with environmental  
446 stress: an experimental study and meta-analysis. *Evolution* **65**, 246-258. (doi:10.1111/j.1558-  
447 5646.2010.01108.x).
- 448 [27] Miller, P.S. 1994 Is inbreeding depression more severe in a stressful environment. *Zoo*  
449 *Biol.* **13**, 195-208. (doi:10.1002/zoo.1430130302).
- 450 [28] Dahlgaard, J. & Loeschcke, V. 1997 Effects of inbreeding in three life stages of  
451 *Drosophila buzzatii* after embryos were exposed to a high temperature stress. *Heredity* **78**,  
452 410-416. (doi:10.1038/hdy.1997.64).

453 [29] Kristensen, T.N., Barker, J.S.F., Pedersen, K.S. & Loeschcke, V. 2008 Extreme  
454 temperatures increase the deleterious consequences of inbreeding under laboratory and  
455 semi-natural conditions. *P. Roy. Soc. B-Biol. Sci.* **275**, 2055-2061.  
456 (doi:10.1098/rspb.2008.0426).

457 [30] Auld, J.R. & Henkel, J.F. 2014 Diet alters delayed selfing, inbreeding depression, and  
458 reproductive senescence in a freshwater snail. *Ecology and Evolution* **4**, 2968-2977.  
459 (doi:10.1002/ece3.1146).

460 [31] Freitag, D., Bos, N., Stucki, D. & Sundström, L. 2014 Inbreeding-related trade-offs in  
461 stress resistance in the ant *Formica exsecta*. *Biol. Lett.* **10**. (doi:20140805  
462 10.1098/rsbl.2014.0805).

463 [32] Duarte, L.C., Bouteiller, C., Fontanillas, P., Petit, E. & Perrin, N. 2003 Inbreeding in the  
464 greater white-toothed shrew, *Crocidura russula*. *Evolution* **57**, 638-645.

465 [33] Enders, L.S. & Nunney, L. 2012 Seasonal stress drives predictable changes in inbreeding  
466 depression in field-tested captive populations of *Drosophila melanogaster*. *P. Roy. Soc. B-*  
467 *Biol. Sci.* **279**, 3756-3764. (doi:10.1098/rspb.2012.1018).

468 [34] Pekkala, N., Knott, K.E., Kotiaho, J.S., Nissinen, K. & Puurtinen, M. 2014 The effect of  
469 inbreeding rate on fitness, inbreeding depression and heterosis over a range of inbreeding  
470 coefficients. *Evolutionary Applications* **7**, 1107-1119. (doi:10.1111/eva.12145).

471 [35] Reed, D.H. & Frankham, R. 2003 Correlation between fitness and genetic diversity.  
472 *Conserv. Biol.* **17**, 230-237. (doi:10.1046/j.1523-1739.2003.01236.x).

473 [36] Vega-Trejo, R., Head, M.L. & Jennions, M.D. 2016 Inbreeding depression does not  
474 increase after exposure to a stressful environment: a test using compensatory growth. *BMC*  
475 *Evol. Biol.*, In press.

476 [37] Abramoff, M.D., Magelhaes, P.J. & Ram, S.J. 2004 Image processing with ImageJ.  
477 *Biophotonics International* **11**, 36-42.

478 [38] Booksmythe, I., Head, M.L., Keogh, J.S. & Jennions, M.D. 2016 Fitness consequences of  
479 artificial selection on relative male genital size. *Nature Communications*, In press.

480 [39] R Development Core Team. 2012 *R: A Language and Environment for Statistical*  
481 *Computing*. Vienna, Austria, R Foundation for Statistical Computing.

482 [40] Harrison, X.A. 2014 Using observation-level random effects to model overdispersion in  
483 count data in ecology and evolution. *PeerJ* **2**, e616. (doi:10.7717/peerj.616).

484 [41] Crawley, M.J. 2005 *Statistics: An Introduction Using R*. Chichester, J. Wiley.

485 [42] Charlesworth, D. & Charlesworth, B. 1987 Inbreeding depression and its evolutionary  
486 consequences. *Annu. Rev. Ecol. Syst.* **18**, 237-268.  
487 (doi:10.1146/annurev.es.18.110187.001321).

488 [43] Lynch, M. & Walsh, B. 1998 *Genetics and Analysis of Quantitative Traits*. Sunderland,  
489 MA, USA.

490 [44] Frère, C.H., Chandrasoma, D. & Whiting, M.J. 2015 Polyandry in dragon lizards: inbred  
491 paternal genotypes sire fewer offspring. *Ecology and Evolution* **5**, 1686-1692.  
492 (doi:10.1002/ece3.1447).

493 [45] Cain, B., Wandera, A.B., Shawcross, S.G., Harris, W.E., Stevens-Wood, B., Kemp, S.J.,  
494 Okita-Ouma, B. & Watts, P.C. 2014 Sex-Biased Inbreeding Effects on Reproductive Success  
495 and Home Range Size of the Critically Endangered Black Rhinoceros. *Conserv. Biol.* **28**, 594-  
496 603. (doi:10.1111/cobi.12175).

497 [46] Chapman, J.R. & Sheldon, B.C. 2011 Heterozygosity is unrelated to adult fitness  
498 measures in a large, noninbred population of great tits (*Parus major*). *J. Evol. Biol.* **24**, 1715-  
499 1726. (doi:10.1111/j.1420-9101.2011.02295.x).

500 [47] Coltman, D.W. & Slate, J. 2003 Microsatellite measures of inbreeding: a meta-analysis.  
501 *Evolution* **57**, 971-983. (doi:10.1111/j.0014-3820.2003.tb00309.x).

502 [48] Szulkin, M., Bierne, N. & David, P. 2010 Heterozygosity-fitness correlations: a time for  
503 reappraisal. *Evolution* **64**, 1202-1217. (doi:10.1111/j.1558-5646.2010.00966.x).

504 [49] Mulard, H., Danchin, E., Talbot, S.L., Ramey, A.M., Hatch, S.A., White, J.F., Helfenstein, F.  
505 & Wagner, R.H. 2009 Evidence that pairing with genetically similar mates is maladaptive in a  
506 monogamous bird. *BMC Evol. Biol.* **9**. (doi:10.1186/1471-2148-9-147).

507 [50] Velando, A., Barros, A. & Moran, P. 2015 Heterozygosity-fitness correlations in a  
508 declining seabird population. *Mol. Ecol.* **24**, 1007-1018. (doi:10.1111/mec.13092).

509 [51] Aspi, J. 2000 Inbreeding and outbreeding depression in male courtship song characters  
510 in *Drosophila montana*. *Heredity* **84**, 273-282. (doi:10.1046/j.1365-2540.2000.00655.x).

511 [52] Joron, M. & Brakefield, P.M. 2003 Captivity masks inbreeding effects on male mating  
512 success in butterflies. *Nature* **424**, 191-194. (doi:10.1038/nature01713).

513 [53] Okada, K., Blount, J.D., Sharma, M.D., Snook, R.R. & Hosken, D.J. 2011 Male  
514 attractiveness, fertility and susceptibility to oxidative stress are influenced by inbreeding in  
515 *Drosophila simulans*. *J. Evol. Biol.* **24**, 363-371. (doi:10.1111/j.1420-9101.2010.02170.x).

516 [54] Ayres, R.M., Pettigrove, V.J. & Hoffmann, A.A. 2010 Low diversity and high levels of  
517 population genetic structuring in introduced eastern mosquitofish (*Gambusia holbrooki*) in  
518 the greater Melbourne area, Australia. *Biol. Invasions* **12**, 3727-3744. (doi:10.1007/s10530-  
519 010-9766-z).

520 [55] Kahn, A.T., Livingston, J.D. & Jennions, M.D. 2012 Do females preferentially associate  
521 with males given a better start in life? *Biol. Lett.* **8**, 362-364. (doi:10.1098/rsbl.2011.1106).

522 [56] Moreau, J., Thiery, D., Troussard, J.P. & Benrey, B. 2007 Grape variety affects female but  
523 also male reproductive success in wild European grapevine moths. *Ecol. Entomol.* **32**, 747-  
524 753. (doi:10.1111/j.1365-2311.2007.00930.x).

525 [57] Rahman, M.M., Kelley, J.L. & Evans, J.P. 2013 Condition-dependent expression of pre-  
526 and postcopulatory sexual traits in guppies. *Ecology and Evolution* **3**, 2197-2213.  
527 (doi:10.1002/ece3.632).

528 [58] Muller, K., Thiery, D., Moret, Y. & Moreau, J. 2015 Male larval nutrition affects adult  
529 reproductive success in wild European grapevine moth (*Lobesia botrana*). *Behav. Ecol.*  
530 *Sociobiol.* **69**, 39-47. (doi:10.1007/s00265-014-1815-7).

531 [59] Fox, C.W., Stillwell, R.C., Wallin, W.G., Curtis, C.L. & Reed, D.H. 2011 Inbreeding-  
532 environment interactions for fitness: complex relationships between inbreeding depression  
533 and temperature stress in a seed-feeding beetle. *Evol. Ecol.* **25**, 25-43. (doi:10.1007/s10682-  
534 010-9376-3).

535 [60] Reed, D.H. & Bryant, E.H. 2001 The relative effects of mutation accumulation versus  
536 inbreeding depression on fitness in experimental populations of the housefly. *Zoo Biol.* **20**,  
537 145-156. (doi:DOI 10.1002/zoo.1016).

538 [61] Reed, D.H., Lowe, E.H., Briscoe, D.A. & Frankham, R. 2003 Fitness and adaptation in a  
539 novel environment: Effect of inbreeding, prior environment, and lineage. *Evolution* **57**, 1822-  
540 1828. (doi:10.1111/j.0014-3820.2003.tb00589.x.).

541 [62] Mallet, M.A. & Chippindale, A.K. 2011 Inbreeding reveals stronger net selection on  
542 *Drosophila melanogaster* males: implications for mutation load and the fitness of sexual  
543 females. *Heredity* **106**, 994-1002. (doi:10.1038/hdy.2010.148).

544 [63] Drayton, J.M., Hunt, J., Brooks, R. & Jennions, M.D. 2007 Sounds different: inbreeding  
545 depression in sexually selected traits in the cricket *Teleogryllus commodus*. *J. Evol. Biol.* **20**,  
546 1138-1147. (doi:10.1111/j.1420-9101.2006.01286.x).

547 [64] Bolund, E., Martin, K., Kempnaers, B. & Forstmeier, W. 2010 Inbreeding depression of  
548 sexually selected traits and attractiveness in the zebra finch. *Anim. Behav.* **79**, 947-955.  
549 (doi:10.1016/j.anbehav.2010.01.014).

550 [65] David, P., Bjorksten, T., Fowler, K. & Pomiankowski, A. 2000 Condition-dependent  
551 signalling of genetic variation in stalk-eyes flies. *Nature* **406**, 186-188.  
552 (doi:10.1038/35018079).

553 [66] Ingleby, F.C., Hunt, J. & Hosken, D.J. 2010 The role of genotype-by-environment  
554 interactions in sexual selection. *J. Evol. Biol.* **23**, 2031-2045. (doi:10.1111/j.1420-  
555 9101.2010.02080.x).

556 [67] Brooks, R. & Caithness, N. 1995 Female choice in a feral guppy population - are there  
557 multiple cues. *Anim. Behav.* **50**, 301-307. (doi:10.1006/anbe.1995.0246).

558 [68] Langerhans, R.B., Layman, C.A. & DeWitt, T.J. 2005 Male genital size reflects a tradeoff  
559 between attracting mates and avoiding predators in two live-bearing fish species. *Proc. Natl.*  
560 *Acad. Sci. U. S. A.* **102**, 7618-7623. (doi:10.1073/pnas.0500935102).

561 [69] Kahn, A.T., Mautz, B. & Jennions, M.D. 2010 Females prefer to associate with males  
562 with longer intromittent organs in mosquitofish. *Biol. Lett.* **6**, 55-58.  
563 (doi:10.1098/rsbl.2009.0637).

564 [70] Devigili, A., Evans, J.P., Di Nisio, A. & Pilastro, A. 2015 Multivariate selection drives  
565 concordant patterns of pre- and postcopulatory sexual selection in a livebearing fish. *Nature*  
566 *Communications* **6**. (doi:10.1038/ncomms9291).

567 [71] Head, M.L., Vega-Trejo, R., Jacomb, F. & Jennions, M.D. 2015 Predictors of male  
568 insemination success in the mosquitofish (*Gambusia holbrooki*). *Ecology and Evolution* **5**,  
569 4999-5006. (doi:10.1002/ece3.1775).

570 [72] Bisazza, A. & Marin, G. 1995 Sexual selection and sexual size dimorphism in the eastern  
571 mosquitofish *Gambusia holbrooki* (Pisces Poeciliidae). *Ethol. Ecol. Evol.* **7**, 169-183.

572 [73] Langerhans, R.B. 2011 Genital evolution. In *Ecology and evolution of poeciliid fishes*  
573 (eds. J.P. Evans, A. Pilastro & I. Schlupp), pp. 228–240. Chicago, IL., University of Chicago  
574 Press.

575 [74] Pilastro, A., Giacomello, E. & Bisazza, A. 1997 Sexual selection for small size in male  
576 mosquitofish (*Gambusia holbrooki*). *P. Roy. Soc. B-Biol. Sci.* **264**, 1125-1129.  
577 (doi:10.1098/rspb.1997.0155).

578 [75] O'Dea, R.E., Jennions, M.D. & Head, M.L. 2014 Male body size and condition affects  
579 sperm number and production rates in mosquitofish, *Gambusia holbrooki*. *J. Evol. Biol.* **27**,  
580 2739-2744. (doi:10.1111/jeb.12534).

581 [76] Booksmythe, I., Backwell, P.R.Y. & Jennions, M.D. 2013 Competitor size, male mating  
582 success and mate choice in eastern mosquitofish, *Gambusia holbrooki*. *Anim. Behav.* **85**,  
583 371-375. (doi:10.1016/j.anbehav.2012.11.009).

584 [77] Whitlock, M.C. 2000 Fixation of new alleles and the extinction of small populations: drift  
585 load, beneficial alleles, and sexual selection. *Evolution* **54**, 1855-1861. (doi:10.1111/j.0014-  
586 3820.2000.tb01232.x).

587 [78] Radwan, J., Unrug, J., Snigorska, K. & Gawronska, K. 2004 Effectiveness of sexual  
588 selection in preventing fitness deterioration in bulb mite populations under relaxed natural  
589 selection. *J. Evol. Biol.* **17**, 94-99. (doi:10.1046/j.1420-9101.2003.00646.x).

590 [79] Sharp, N.P. & Agrawal, A.F. 2008 Mating density and the strength of sexual selection  
591 against deleterious alleles in *Drosophila melanogaster*. *Evolution* **62**, 857-867.  
592 (doi:10.1111/j.1558-5646.2008.00333.x).

593 [80] Hollis, B., Fierst, J.L. & Houle, D. 2009 Sexual selection accelerates the elimination of a  
594 deleterious mutant in *Drosophila melanogaster*. *Evolution* **63**, 324-333. (doi:10.1111/j.1558-  
595 5646.2008.00551.x).

596 [81] Charpentier, M.J.E., Widdig, A. & Alberts, S.C. 2007 Inbreeding depression in non-  
597 human primates: A historical review of methods used and empirical data. *Am. J. Primatol.*  
598 **69**, 1370-1386. (doi:10.1002/ajp.20445).

599

Table 1. Results from the mixed model with parameter estimates and chi square ( $\chi^2$ ) tests for heterozygosity, inbreeding, food treatment, size, and relative gonopodium size. P-values in bold indicate significant values.

|                     | Predictor                         | Estimate | SE     | $\chi^2$ | P            |
|---------------------|-----------------------------------|----------|--------|----------|--------------|
| Number of offspring | Intercept                         | -17.295  | 13.888 | 1.551    | 0.213        |
|                     | Relative heterozygosity           | 0.114    | 0.201  | 0.319    | 0.572        |
|                     | Inbreeding (inbred)               | -0.943   | 0.399  | 5.596    | <b>0.018</b> |
|                     | Diet (low food)                   | 0.763    | 0.469  | 2.643    | 0.104        |
|                     | Size [ln(mm)]                     | 12.829   | 10.004 | 1.645    | 0.199        |
|                     | Relative gonopodium size [ln(mm)] | 0.483    | 0.212  | 5.179    | <b>0.023</b> |

Figure 1. Mean number of offspring ( $\pm$  SE) sired by outbred and inbred males.

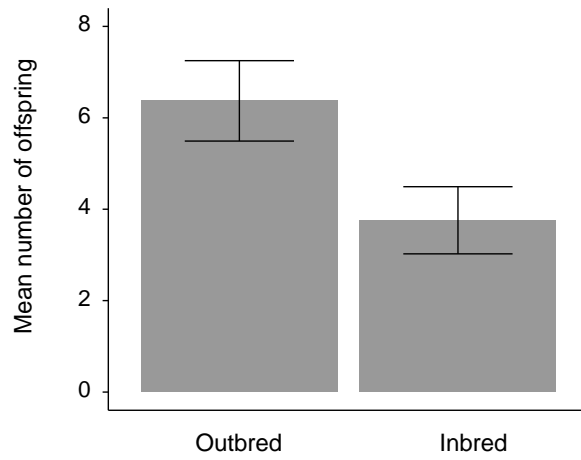

Source: http://biorxiv.org/content/10.1101/045716v1.full.pdf
